# Supplementary material for: Microencapsulated UV filter@ZIF-8 based sunscreens for broad spectrum UV protection
Source: PubMed Central journal article supplement — RSC Adv. 2020 Sep 15;10(56):34254–60. doi: 10.1039/d0ra05828a (PMC9056713; doi:10.1039/d0ra05828a), 2020-09-15
Supplement: RA-010-D0RA05828A-s001.pdf [file RA-010-D0RA05828A-s001.pdf]

Electronic Supplementary Information for:

## **Microencapsulated UV filter@ZIF-8 based sunscreens for broad spectrum UV protection**

Anu Sharma<sup>a,b</sup>, Abhishek Kumar<sup>b</sup>, Changning Li<sup>b</sup>, Rakesh Kumar Sharma<sup>a\*</sup>, Mark T. Swihart<sup>b,c\*</sup>

<sup>a</sup>*Department of Chemistry, University of Delhi, India*

<sup>b</sup>*Department of Chemical and Biological Engineering, University at Buffalo (SUNY), United States*

<sup>c</sup>*RENEW Institute, University at Buffalo (SUNY), United States*

**Figure S1:** BET adsorption isotherms of ZIF-8, OMC@ZIF-8, BMDM@ZIF-8 and OMC+BMDM@ZIF-8.

**Figure S2:** Calibration curves of OMC and BMDM absorbance vs. concentration.

**Figure S3:** Degradation data for UV filters alone.

**Table ST1:** Pore parameters of ZIF-8 and microencapsulated UV filters.

## SUPPLEMENTARY FIGURES

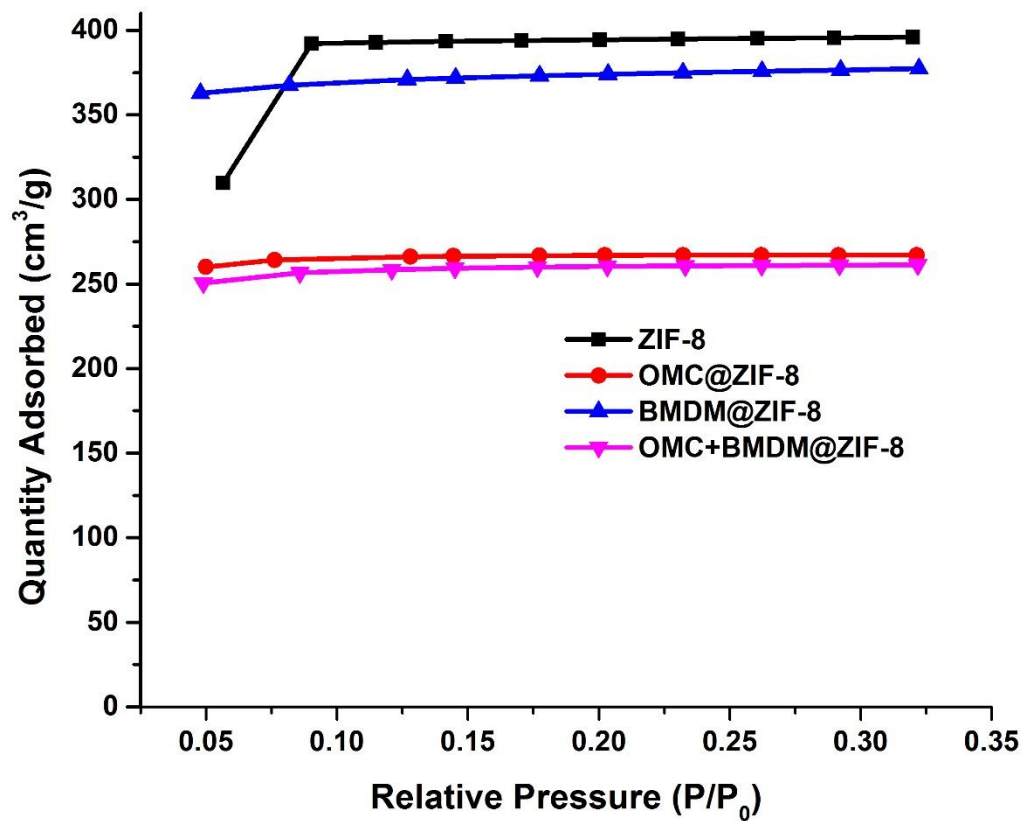

**Figure S1.** BET adsorption isotherms of ZIF-8, OMC@ZIF-8, BMDM@ZIF-8 and OMC+BMDM@ZIF-8.

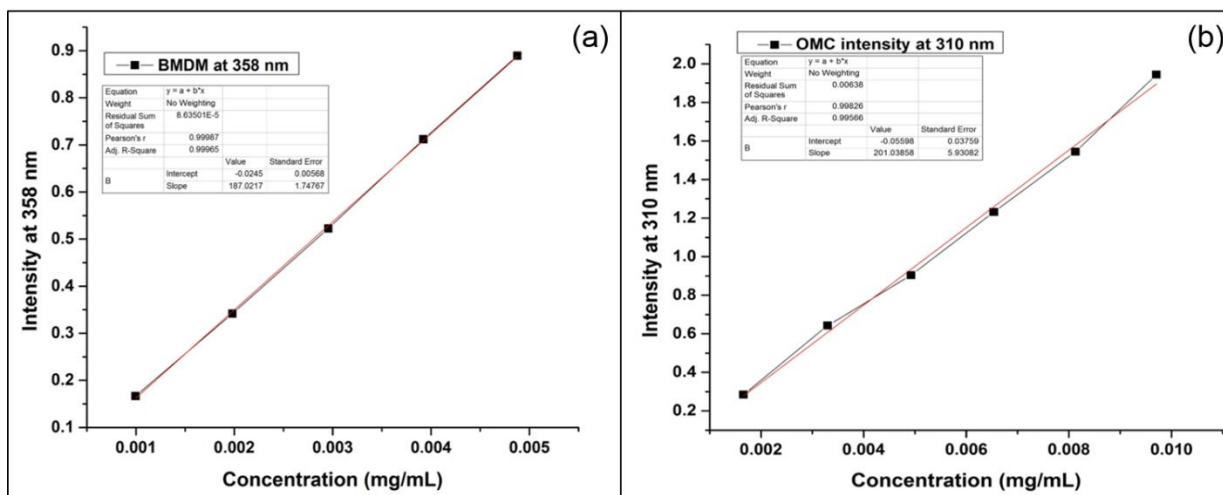

**Figure S2.** Calibration curves of (a) BMDM and (b) OMC used for determining encapsulation efficiency of OMC and BMDM in OMC@ZIF-8, BMDM@ZIF-8 and OMC+BMDM@ZIF-8.

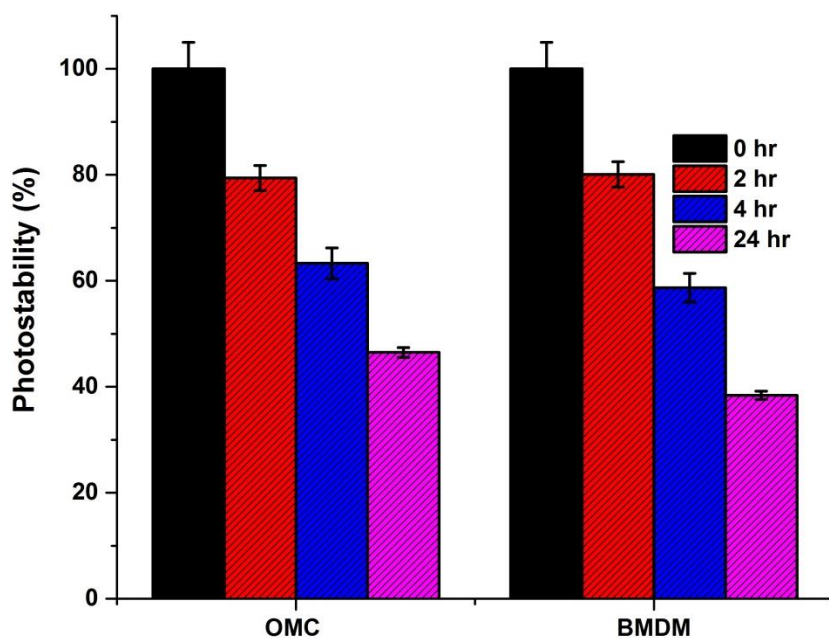

**Figure S3.** Photostability curves of (a) 0.08% OMC and (b) 0.09% BMDM mixed with aveeno cream for studying the degradation rate of UV filters after 0, 2, 4 and 24 hours upon UV exposure.

**SUPPLEMENTARY TABLE**

**Table ST1.** Pore parameters of void ZIF-8 and microencapsulated OMC-ZIF-8, BMDM-ZIF-8 and OMC+BMDM-ZIF-8.

| <b>Sample</b>                                     | <b>ZIF-8</b> | <b>OMC@ZIF-8</b> | <b>BMDM@ZIF-8</b> | <b>OMC+BMDM@ZIF-8</b> |
|---------------------------------------------------|--------------|------------------|-------------------|-----------------------|
| S <sub>BET</sub> (m <sup>2</sup> /g)              | 893          | 606              | 856               | 592                   |
| S <sub>Lang</sub> (m <sup>2</sup> /g)             | 1344         | 908              | 1287              | 891                   |
| Pore volume<br>(cm <sup>3</sup> g <sup>-1</sup> ) | 0.613        | 0.413            | 0.585             | 0.404                 |
| Average<br>pore width<br>(nm)                     | 2.75         | 2.73             | 2.73              | 2.73                  |
